# Supplementary material
Source: PubMed Central journal article supplement (PMC2712208)
Supplement: mmc1.pdf [file mmc1.pdf]

Biophysical Journal, Volume 96

**Supporting Material**

**Visualization of membrane loss during the shrinkage of giant vesicles under electropulsation**

Thomas Portet, Franc Camps i Febrer, Jean-Michel Escoffre , Cyril Favard, Marie-Pierre Rols, and David S. Dean

# Supplementary Information

## I. Information about pulse spacing

Table S1 summarizes times when pulses were applied, and times when images were acquired for the liposomes A, B, C and D presented in the main text. Time origin is defined as the onset of the first pulse. Pictures were taken roughly 0.5 s after each pulse. Numbers in bold font correspond to moments before which recentering had to be carried out (black arrows on fig.2 in the main text). No recentering was necessary for liposome B.

## II. Movies legends

As Supplementary Data, we also provide movies depicting the three different mechanisms of lipid loss described in the main text, whose legends are the following.

**Movie S1:** Animation of a GUV exhibiting lipid loss via the formation of small vesicles. Pulse duration is 5 ms, and pulse amplitude is 410 V/cm. Anode is on the right side of the vesicle. Initial diameter is 41  $\mu\text{m}$ .

**Movie S2:** Animation of liposome B from main text showing the formation of tubular structures. Pulse duration is 5 ms, and pulse amplitude is 360 V/cm. Anode is on the right hand side of the vesicle. Initial diameter is 47  $\mu\text{m}$ .

**Movie S3:** Animation of liposome D from main text showing the formation of pores (indicated by the red arrow) and tubules. Pulse duration is 5 ms, and pulse amplitude is 300 V/cm. Anode is on the right hand side of the vesicle. Initial diameter is 56  $\mu\text{m}$ .

| Pulse/Image number | Liposome A                      |                                 | Liposome B                      |                                 | Liposome C                      |                                 | Liposome D                      |                                 |
|--------------------|---------------------------------|---------------------------------|---------------------------------|---------------------------------|---------------------------------|---------------------------------|---------------------------------|---------------------------------|
|                    | Times of pulse applications (s) | Times of image acquisitions (s) | Times of pulse applications (s) | Times of image acquisitions (s) | Times of pulse applications (s) | Times of image acquisitions (s) | Times of pulse applications (s) | Times of image acquisitions (s) |
| 1                  | 0                               | 0.5                             | 0                               | 0.5                             | 0                               | 0.5                             | 0                               | 0.5                             |
| 2                  | 2                               | 2.5                             | 2                               | 2.5                             | 2                               | 2.5                             | 2                               | 2.5                             |
| 3                  | 4                               | 4.5                             | 4                               | 4.5                             | 4                               | 4.5                             | 4                               | 4.5                             |
| 4                  | 6                               | 6.5                             | 6                               | 6.5                             | 6                               | 6.5                             | 6                               | 6.5                             |
| 5                  | 8                               | 8.5                             | 8                               | 8.5                             | 8                               | 8.5                             | 8                               | 8.5                             |
| 6                  | 10                              | 10.5                            | 10                              | 10.5                            | 10                              | 10.5                            | 10                              | 10.5                            |
| 7                  | 12                              | 12.5                            | 12                              | 12.5                            | 20                              | 20.5                            | 12                              | 12.5                            |
| 8                  | 14                              | 14.5                            | 14                              | 14.5                            | 22                              | 22.5                            | 14                              | 14.5                            |
| 9                  | 16                              | 16.5                            | 16                              | 16.5                            | 24                              | 24.5                            | 16                              | 16.5                            |
| 10                 | 18                              | 18.5                            | 18                              | 18.5                            | 26                              | 26.5                            | 18                              | 18.5                            |
| 11                 | 28                              | 28.5                            | 20                              | 20.5                            | 28                              | 28.5                            | 20                              | 20.5                            |
| 12                 | 30                              | 30.5                            | 22                              | 22.5                            | 30                              | 30.5                            | 22                              | 22.5                            |
| 13                 | 32                              | 32.5                            | 24                              | 24.5                            | 32                              | 32.5                            | 32                              | 32.5                            |
| 14                 | 34                              | 34.5                            | 26                              | 26.5                            | 34                              | 34.5                            | 34                              | 34.5                            |
| 15                 | 36                              | 36.5                            | 28                              | 28.5                            | 36                              | 36.5                            | 36                              | 36.5                            |
| 16                 | 38                              | 38.5                            | 30                              | 30.5                            | 38                              | 38.5                            | 38                              | 38.5                            |
| 17                 | 40                              | 40.5                            | 32                              | 32.5                            | 48                              | 48.5                            | 40                              | 40.5                            |
| 18                 | 42                              | 42.5                            | 34                              | 34.5                            | 50                              | 50.5                            | 42                              | 42.5                            |
| 19                 | 44                              | 44.5                            | 36                              | 36.5                            | 52                              | 52.5                            | 44                              | 44.5                            |
| 20                 | 46                              | 46.5                            | 38                              | 38.5                            | 54                              | 54.5                            | 46                              | 46.5                            |
| 21                 | 56                              | 56.5                            | 40                              | 40.5                            | 56                              | 56.5                            | 48                              | 48.5                            |
| 22                 | 58                              | 58.5                            | 42                              | 42.5                            | 58                              | 58.5                            | 50                              | 50.5                            |
| 23                 | 60                              | 60.5                            | 44                              | 44.5                            | 60                              | 60.5                            | 52                              | 52.5                            |
| 24                 | 62                              | 62.5                            | 46                              | 46.5                            | 62                              | 62.5                            | 54                              | 54.5                            |
| 25                 | 64                              | 64.5                            | 48                              | 48.5                            | 64                              | 64.5                            | 56                              | 56.5                            |
| 26                 | 66                              | 66.5                            | 50                              | 50.5                            | 74                              | 74.5                            | 58                              | 58.5                            |
| 27                 | 68                              | 68.5                            | 52                              | 52.5                            | 76                              | 76.5                            | 60                              | 60.5                            |
| 28                 | 70                              | 70.5                            | 54                              | 54.5                            | 78                              | 78.5                            | 62                              | 62.5                            |
| 29                 |                                 |                                 | 56                              | 56.5                            | 80                              | 80.5                            | 64                              | 64.5                            |
| 30                 |                                 |                                 | 58                              | 58.5                            |                                 |                                 | 66                              | 66.5                            |
| 31                 |                                 |                                 | 60                              | 60.5                            |                                 |                                 | 76                              | 76.5                            |
| 32                 |                                 |                                 | 62                              | 62.5                            |                                 |                                 | 78                              | 78.5                            |
| 33                 |                                 |                                 | 64                              | 64.5                            |                                 |                                 | 80                              | 80.5                            |
| 34                 |                                 |                                 | 66                              | 66.5                            |                                 |                                 | 82                              | 82.5                            |
| 35                 |                                 |                                 | 68                              | 68.5                            |                                 |                                 | 84                              | 84.5                            |
| 36                 |                                 |                                 | 70                              | 70.5                            |                                 |                                 | 86                              | 86.5                            |
| 37                 |                                 |                                 | 72                              | 72.5                            |                                 |                                 | 88                              | 88.5                            |
| 38                 |                                 |                                 | 74                              | 74.5                            |                                 |                                 | 90                              | 90.5                            |
| 39                 |                                 |                                 | 76                              | 76.5                            |                                 |                                 | 92                              | 92.5                            |
| 40                 |                                 |                                 |                                 |                                 |                                 |                                 | 102                             | 102.5                           |
| 41                 |                                 |                                 |                                 |                                 |                                 |                                 | 104                             | 104.5                           |
| 42                 |                                 |                                 |                                 |                                 |                                 |                                 | 106                             | 106.5                           |
| 43                 |                                 |                                 |                                 |                                 |                                 |                                 | 108                             | 108.5                           |
| 44                 |                                 |                                 |                                 |                                 |                                 |                                 | 110                             | 110.5                           |
| 45                 |                                 |                                 |                                 |                                 |                                 |                                 | 112                             | 112.5                           |
| 46                 |                                 |                                 |                                 |                                 |                                 |                                 | 114                             | 114.5                           |
| 47                 |                                 |                                 |                                 |                                 |                                 |                                 | 116                             | 116.5                           |
| 48                 |                                 |                                 |                                 |                                 |                                 |                                 | 118                             | 118.5                           |
| 49                 |                                 |                                 |                                 |                                 |                                 |                                 | 120                             | 120.5                           |
| 50                 |                                 |                                 |                                 |                                 |                                 |                                 | 122                             | 122.5                           |
| 51                 |                                 |                                 |                                 |                                 |                                 |                                 | 124                             | 124.5                           |
| 52                 |                                 |                                 |                                 |                                 |                                 |                                 | 126                             | 126.5                           |
| 53                 |                                 |                                 |                                 |                                 |                                 |                                 | 128                             | 128.5                           |
| 54                 |                                 |                                 |                                 |                                 |                                 |                                 | 130                             | 130.5                           |
| 55                 |                                 |                                 |                                 |                                 |                                 |                                 | 132                             | 132.5                           |

Table S1 : Detailed time information for liposomes A, B, C and D presented in the main text.
